# Supplementary material for: A modular low-cost automated synthesis machine demonstrated by ring-opening metathesis polymerization
Source: Royal Society of Chemistry journal article supplement (doi:10.1039/d3re00345k), 2023-01-01
Supplement: d3re00345k1.pdf [file d3re00345k1.pdf]

## Electronic Supporting Information

# A modular low-cost automated synthesis machine demonstrated by Ring-Opening Metathesis Polymerization<sup>†</sup>

Jakob Rørbæk Saugbjerg,<sup>\*a</sup> Thorbjørn Bøgh Jensen,<sup>\*a</sup> Mogens Hinge,<sup>a</sup> and Martin Lahn Henriksen<sup>‡a</sup>

<sup>a</sup>*Department of Biological and Chemical Engineering, Aarhus University, Åbogade 40, 8200 Aarhus N, Denmark.*

‡ Corresponding Author. \*These authors contributed equally.

E-mail: lahn@bce.au.dk

# Technical drawings

The following sections contain the technical drawings for the ASM modules. Further information can be found on our gitgub repository, where drawings, CAD files (.stl and .ipt), and demonstrations of the ASM can be accessed. [1]

## S1 CAD Stirring module

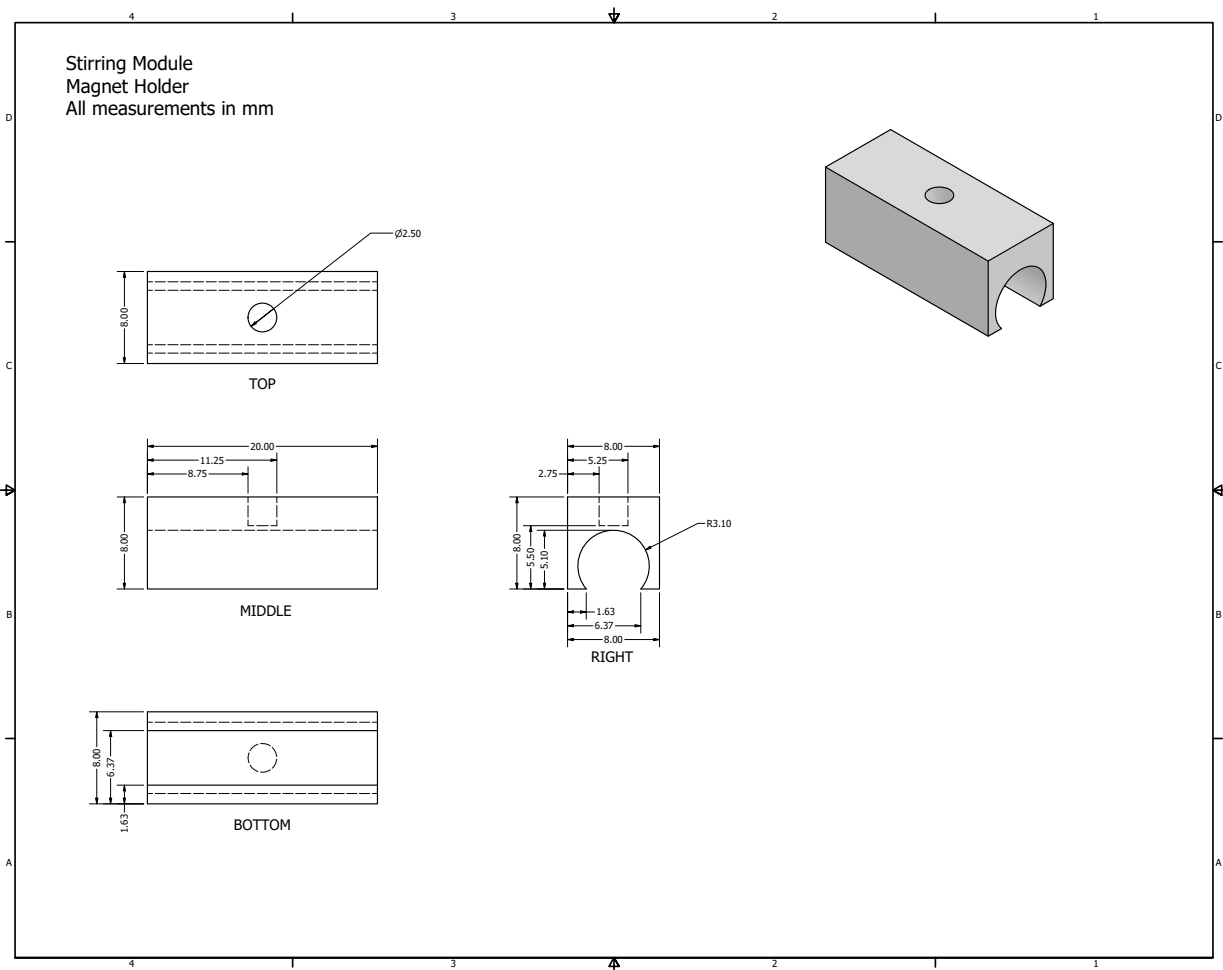

**Figure S1:** CAD drawing of the magnet stir bar holder used to finish the stirring module. The design fits onto the DC motor driving axes and holds a magnetic stir bar.

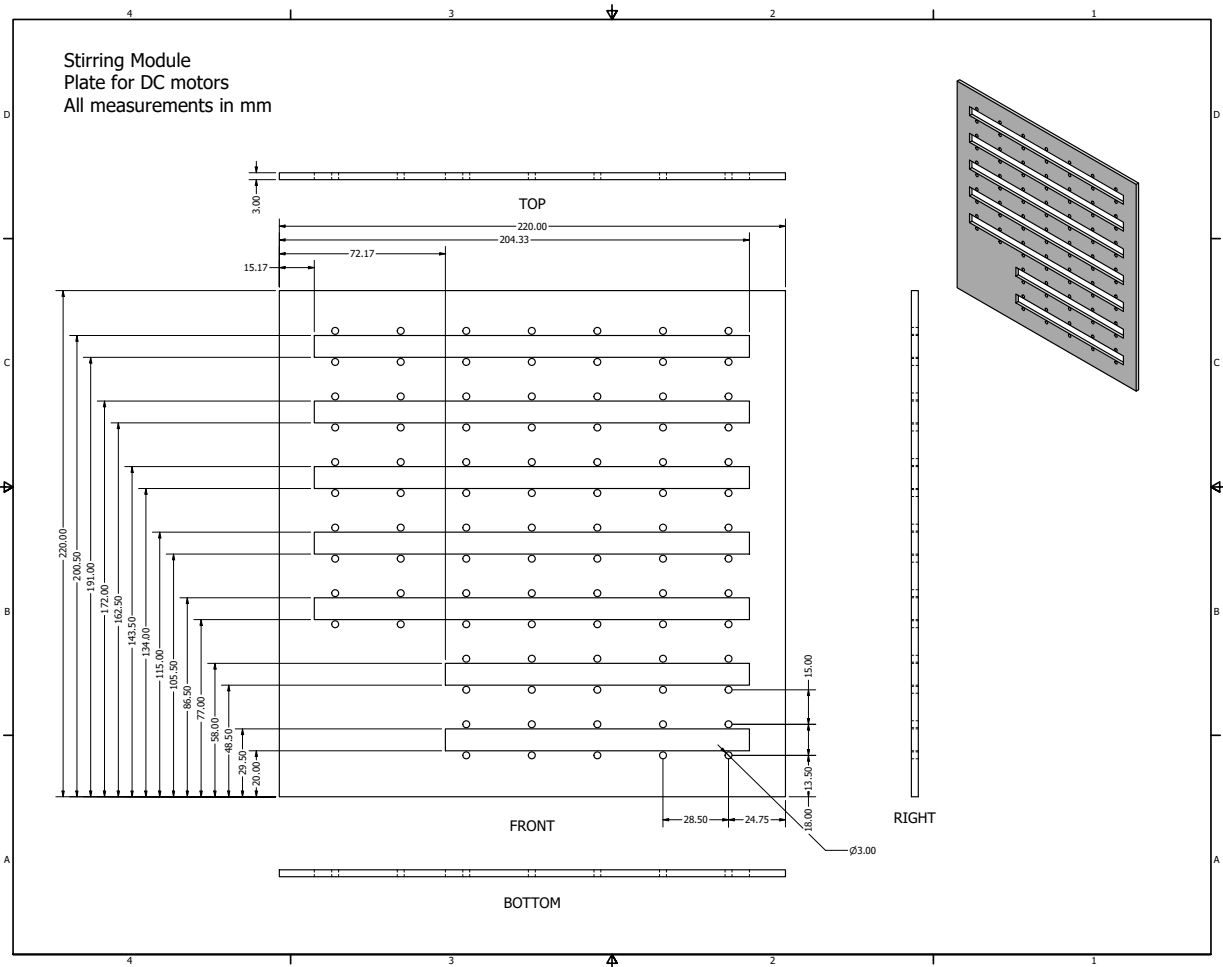

**Figure S2:** CAD drawing of the base plate for the stirring module, used to mount and subsequently connect the DC motors on in blocks.

# S2 CAD Atmospheric control module

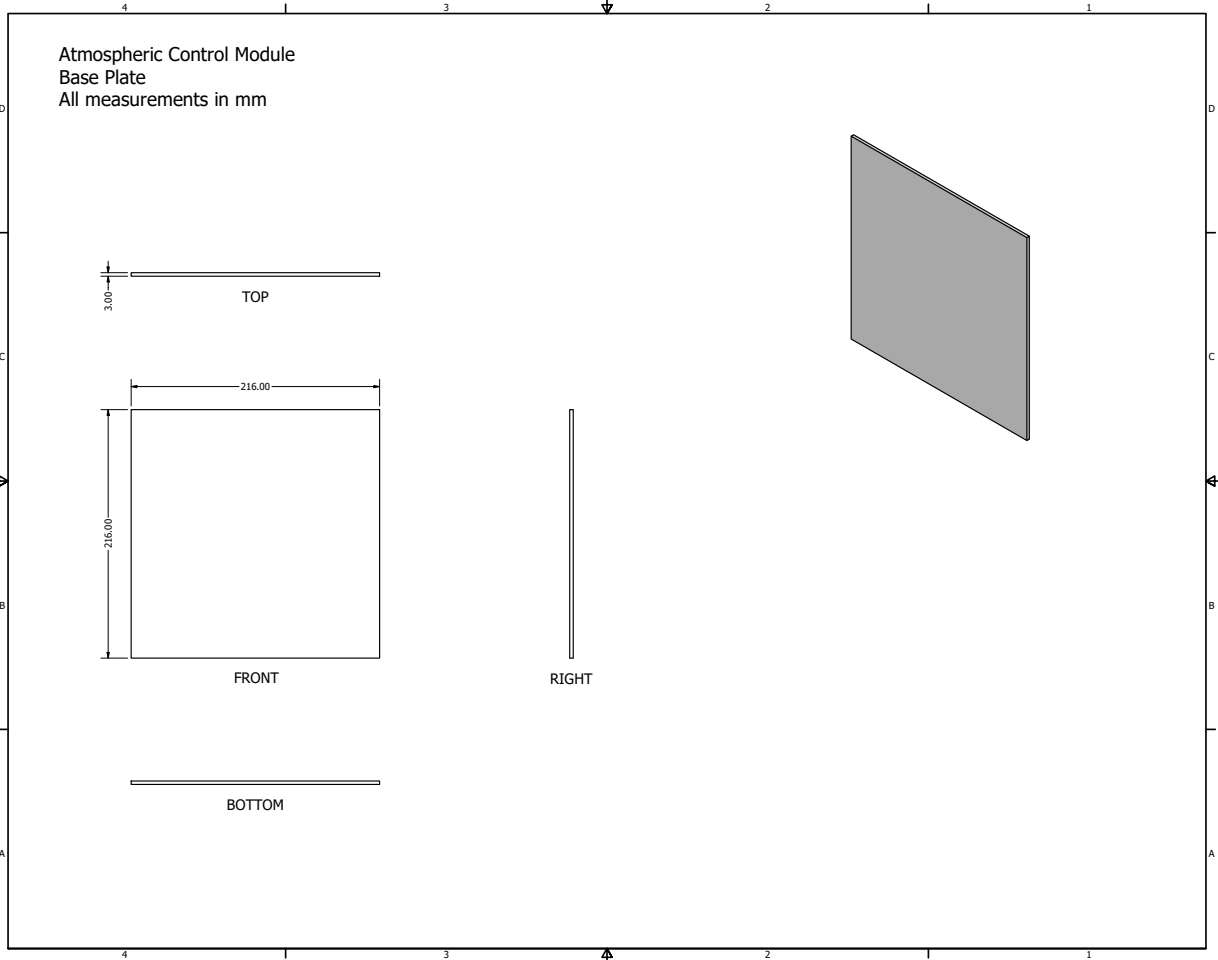

Figure S3: CAD drawing of the base plate used in the atmospheric control box.



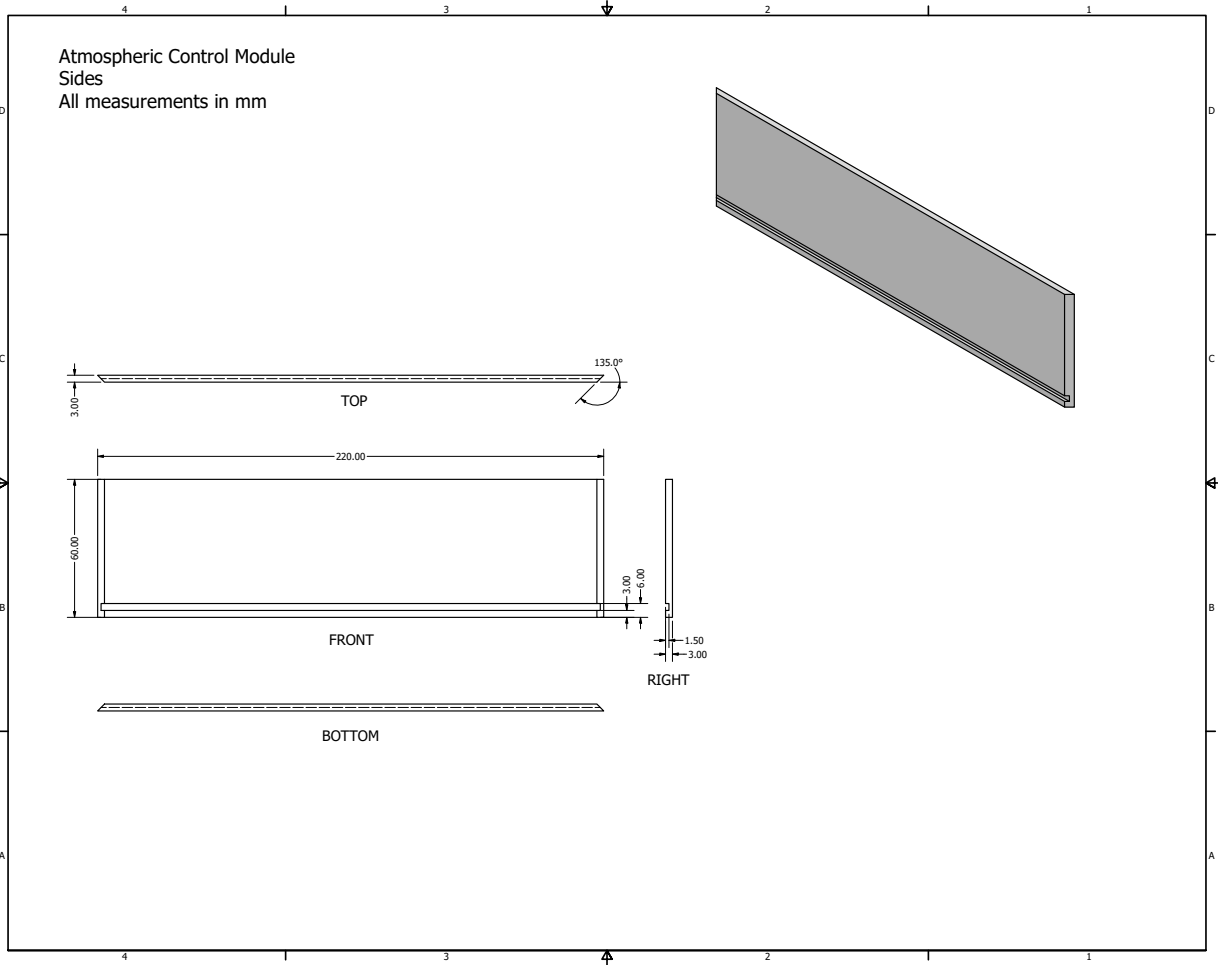

**Figure S4:** CAD drawing of the sides used for the atmospheric control module.

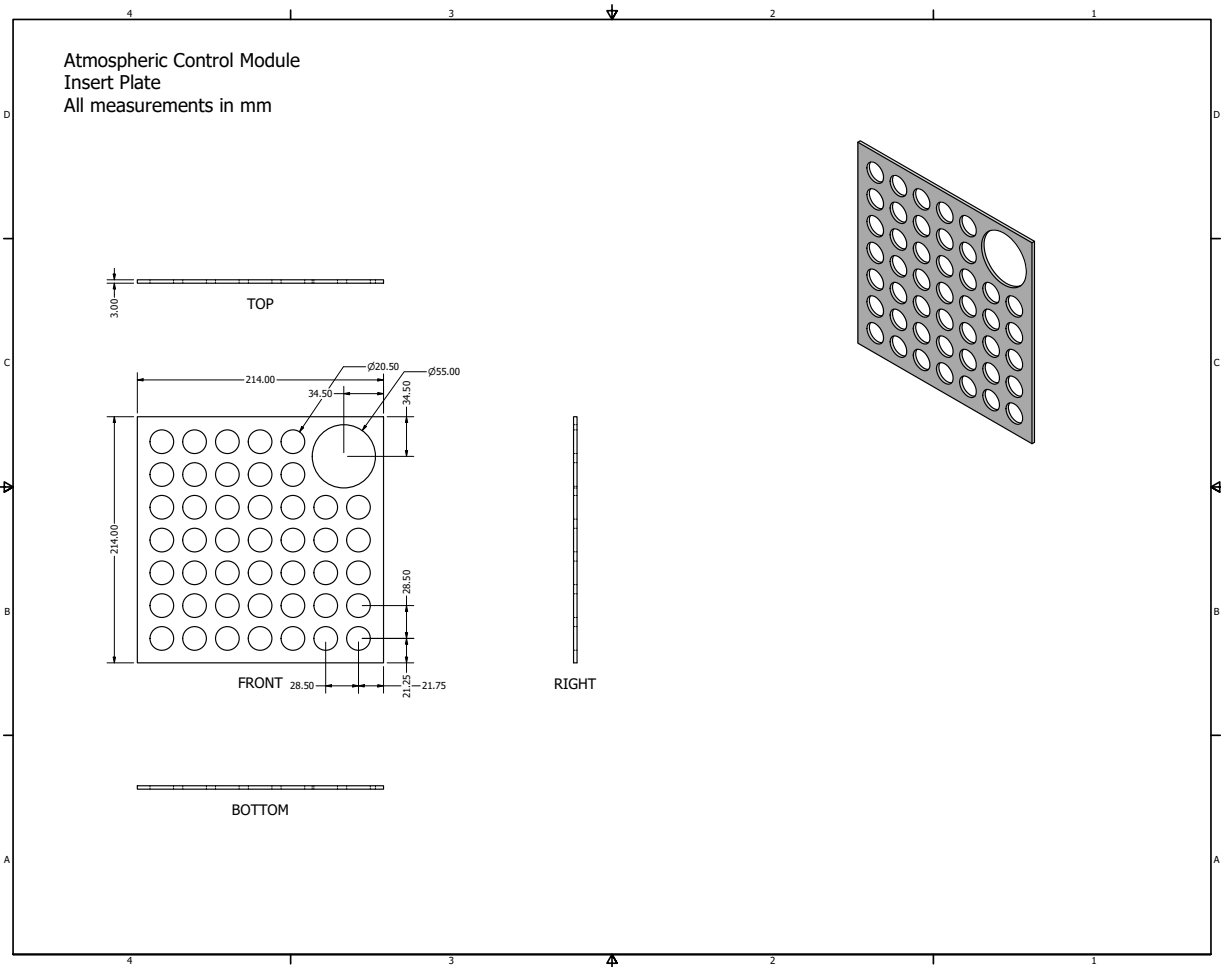

**Figure S5:** CAD drawing of the insert designed for the atmospheric control module. Each hole is designed to fit a 5 mL snap cap vial, and the large hole to fit a waste beaker.

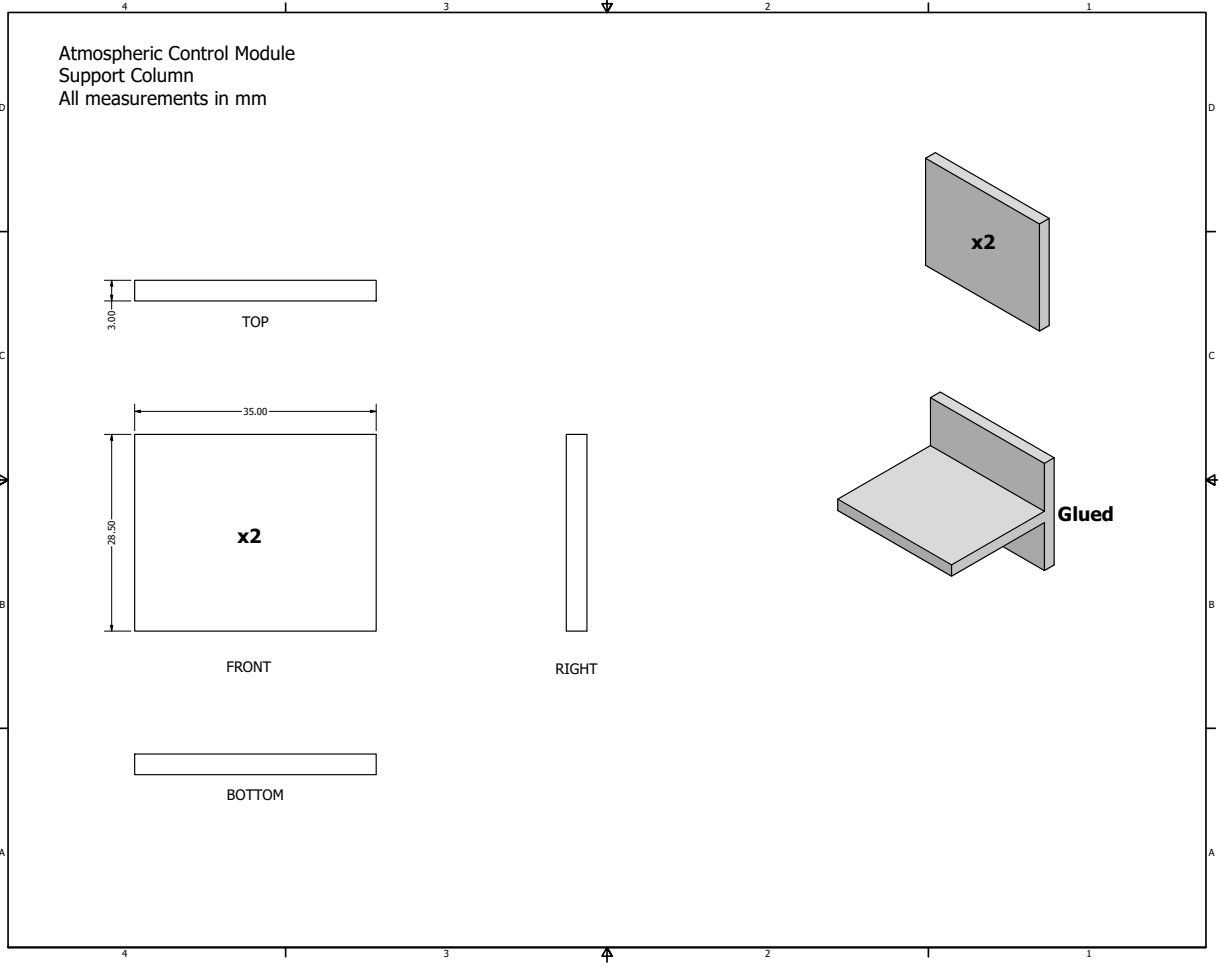

Figure S6: CAD drawing of the feet for the atmospheric control insert.

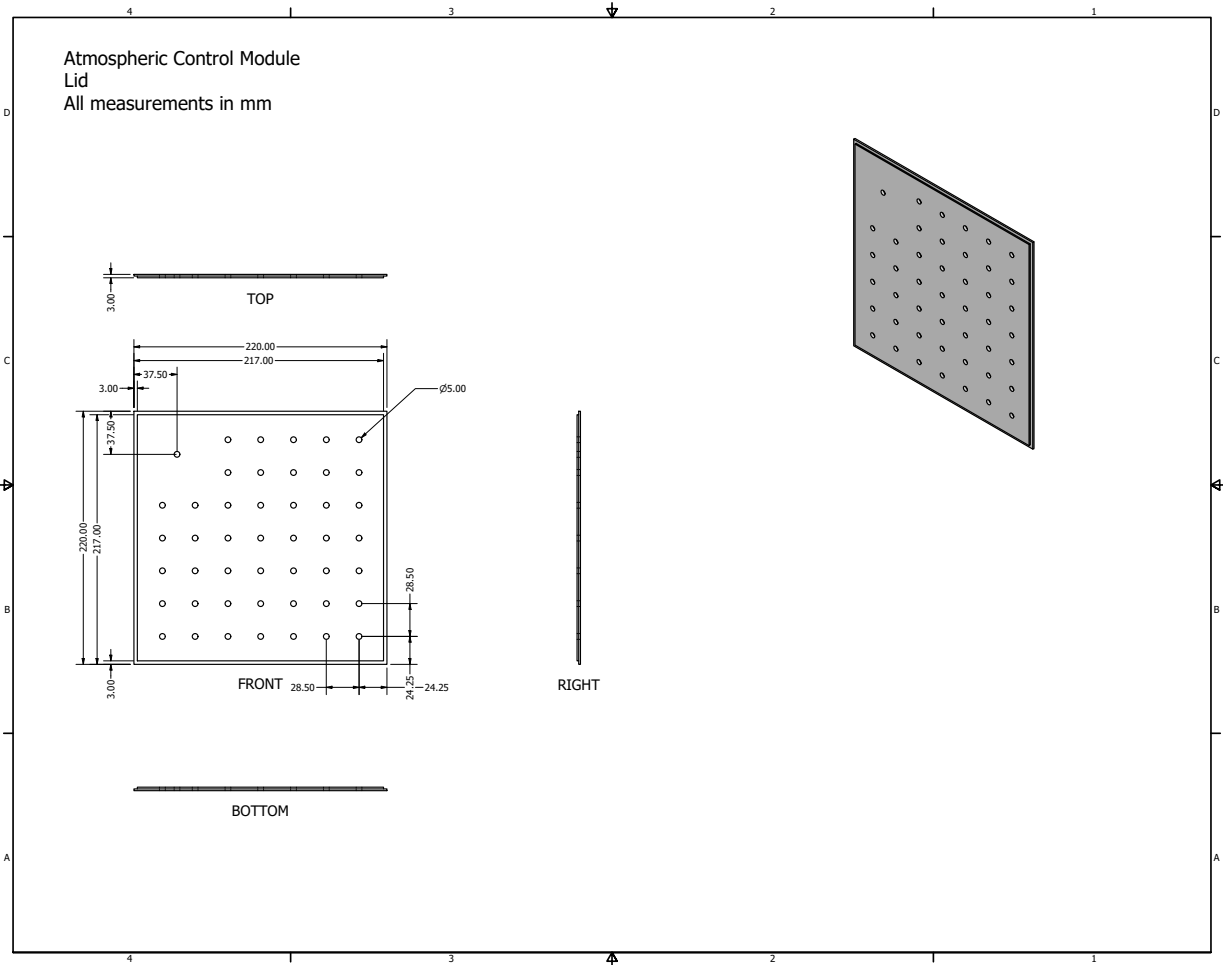

**Figure S7:** CAD drawing of the lid used for the atmospheric control module.

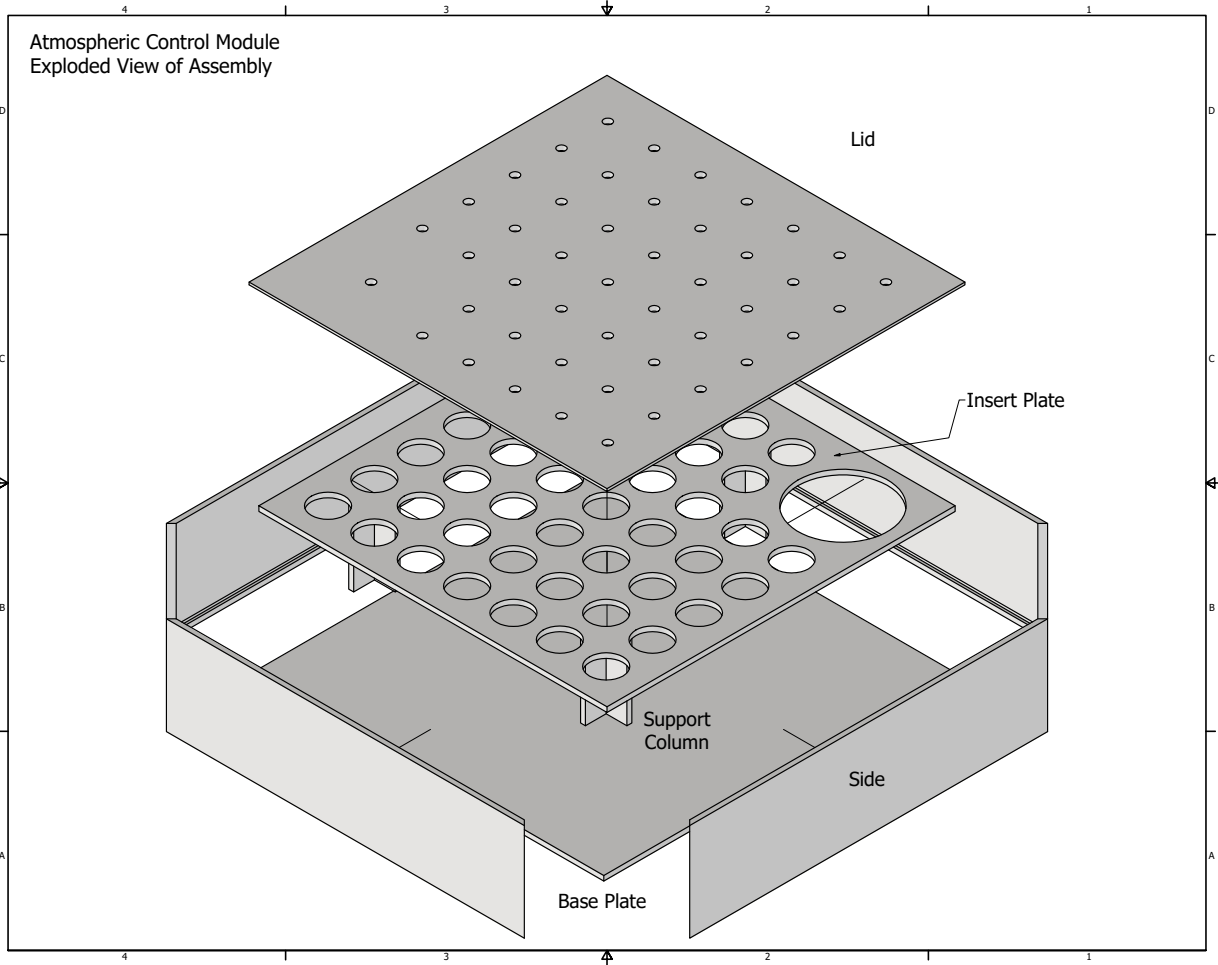

**Figure S8:** Exploded view of the assembled atmospheric control module.

### S3 CAD Dosing module

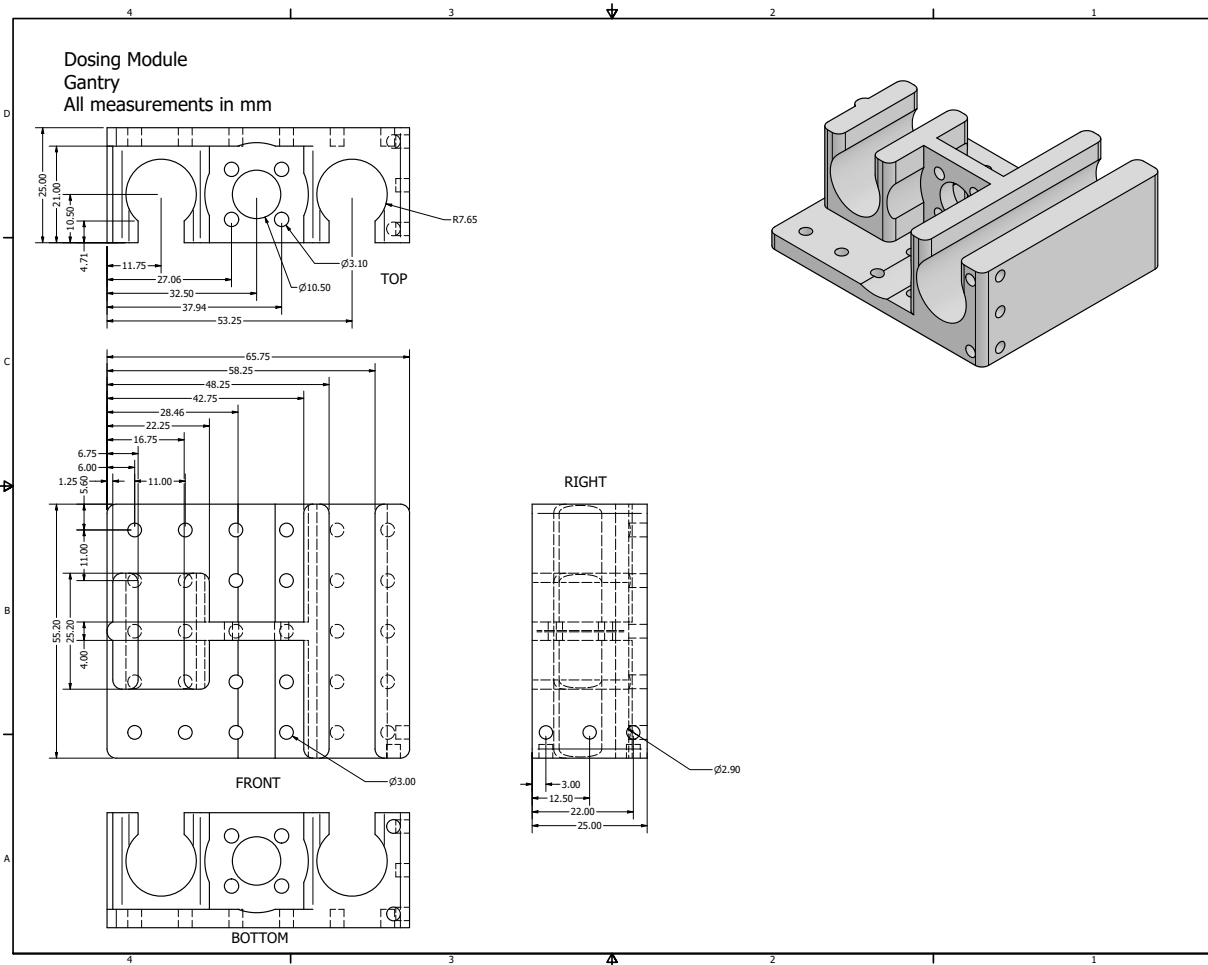

Figure S9: CAD drawing of the X-axis carriage used in the dosing module.

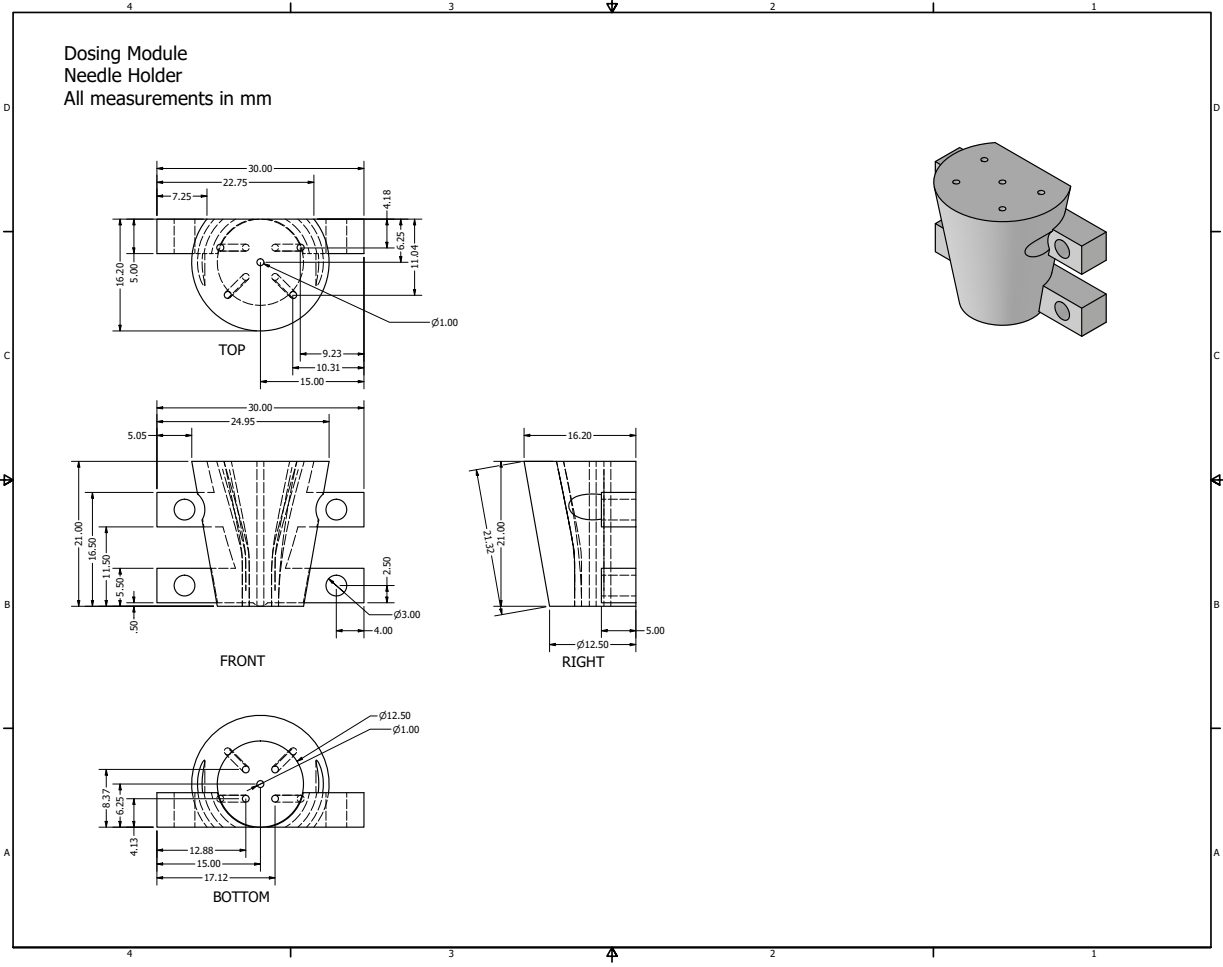

Figure S10: CAD drawing of the needle holder used in the dosing module.

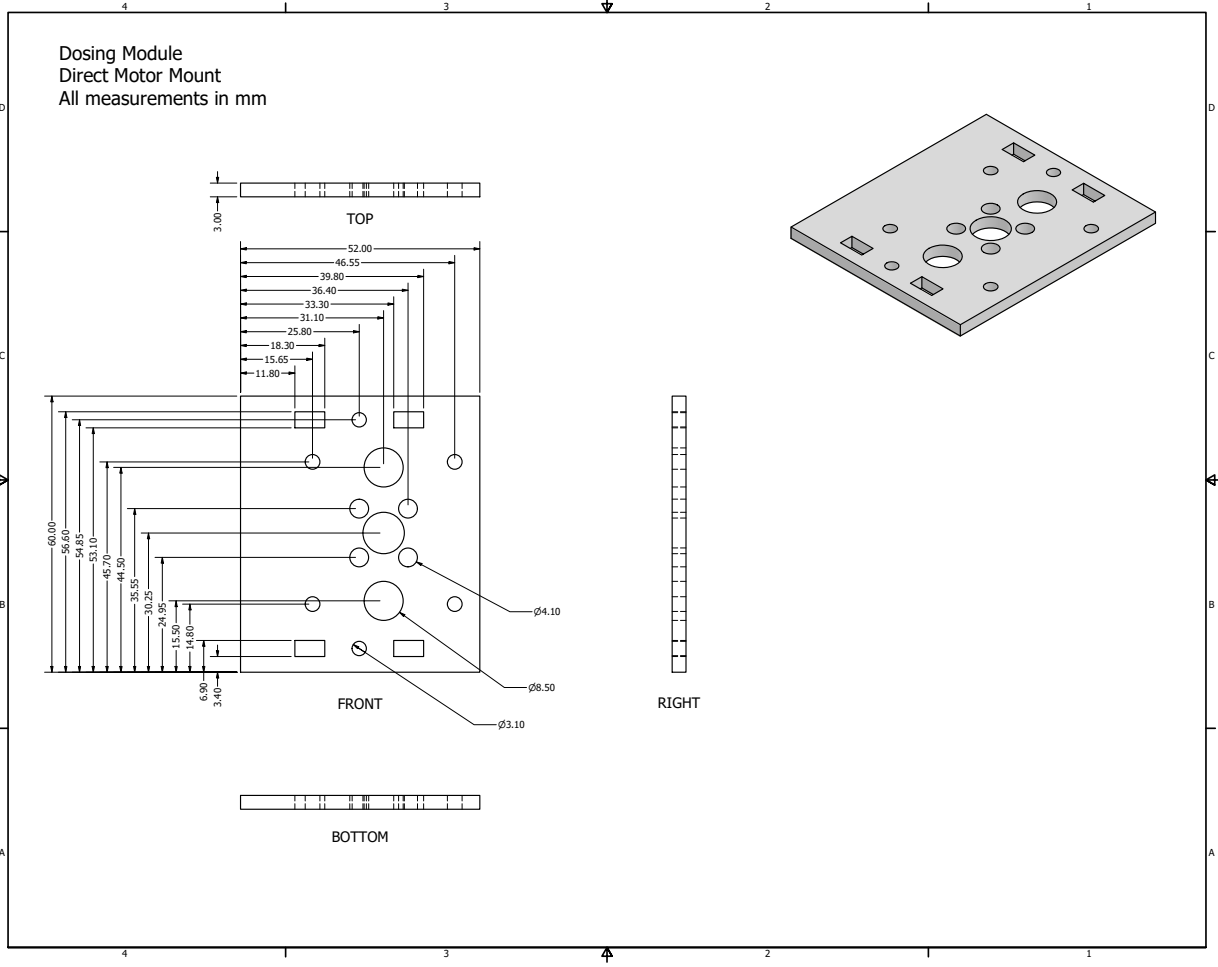

**Figure S11:** CAD drawing of a plate as a modification to the pump system shown in [2]. The modification allows for mounting the stepper motor directly on the driving thread instead of through gearing.



# Machine precision

## S4 Experiment order

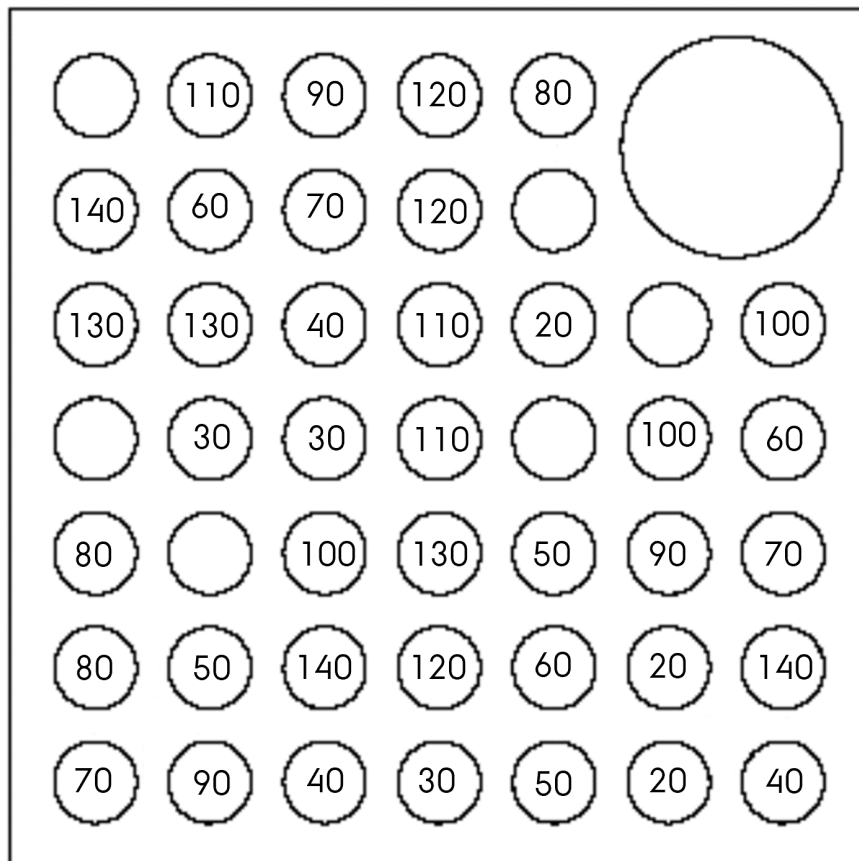

**Figure S12:** Image summarizing the experimental order after randomization and triplication. Each circle represents a vial on the experimental printer bed, with the numbers indicating the target degree of polymerization in each vial.

## S5 Dosing calibration

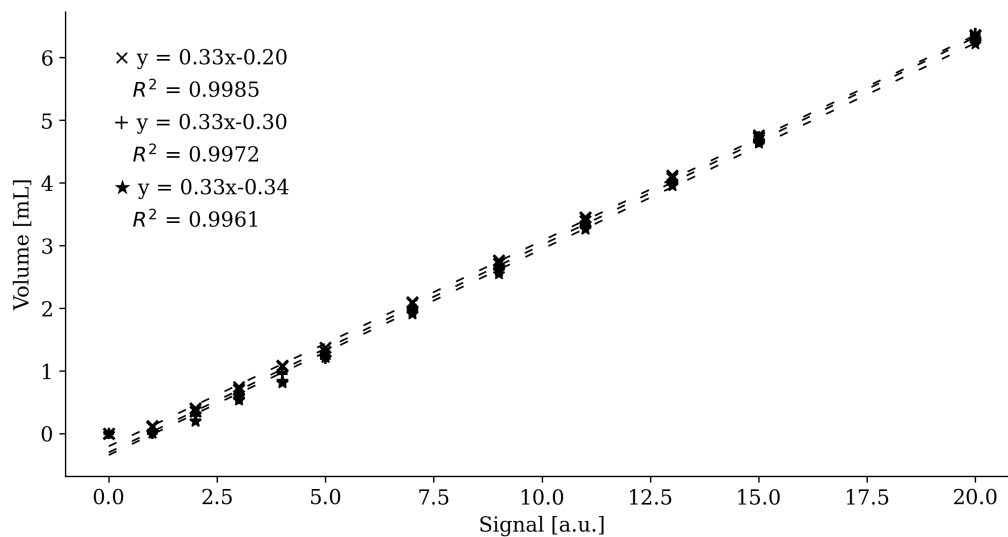

**Figure S13:** Calibrations of the pump module using toluene as the dispensed liquid.

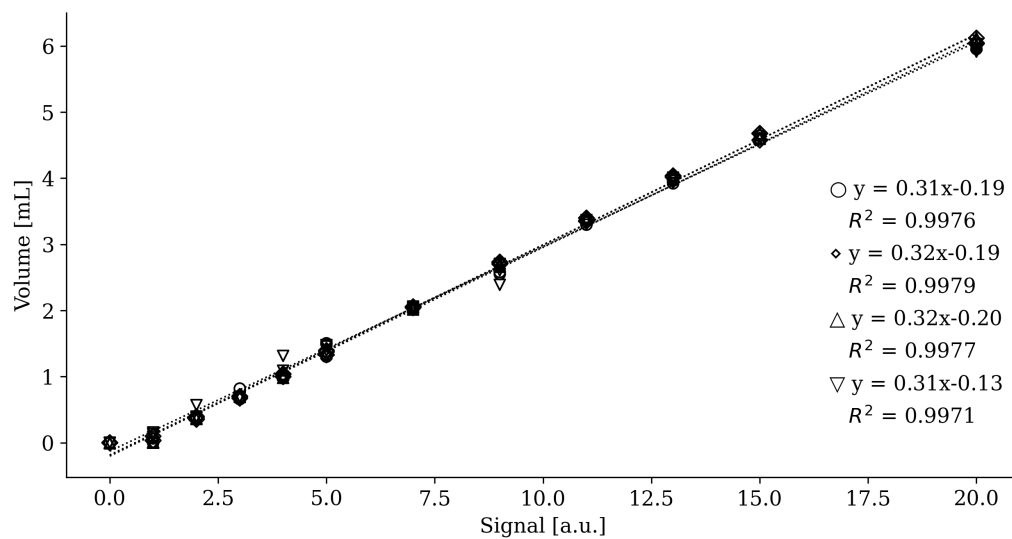

Figure S14: Calibrations of the pump module using water as the dispensed liquid.

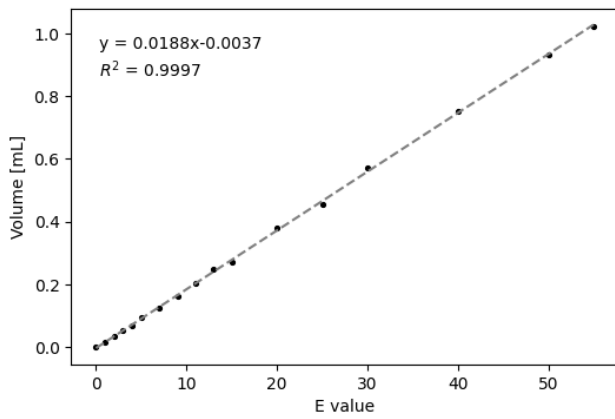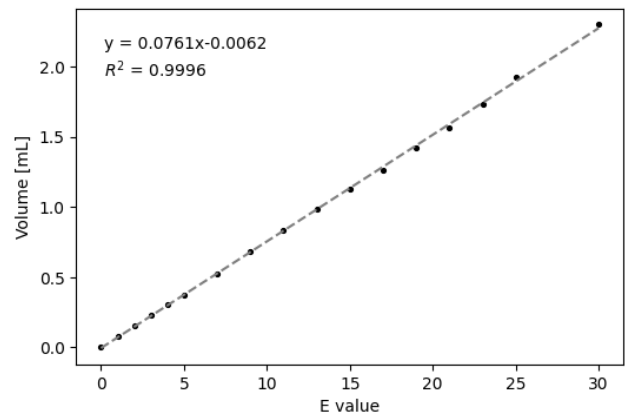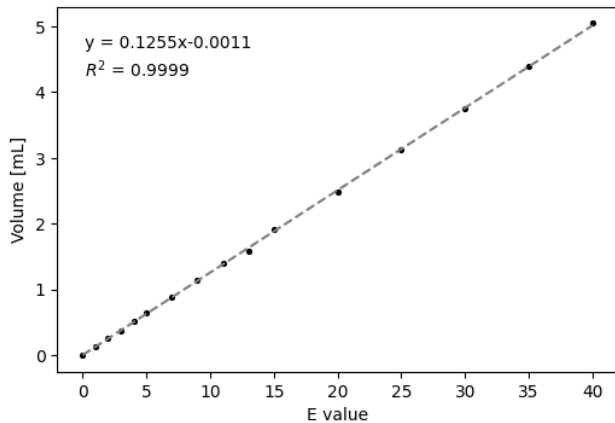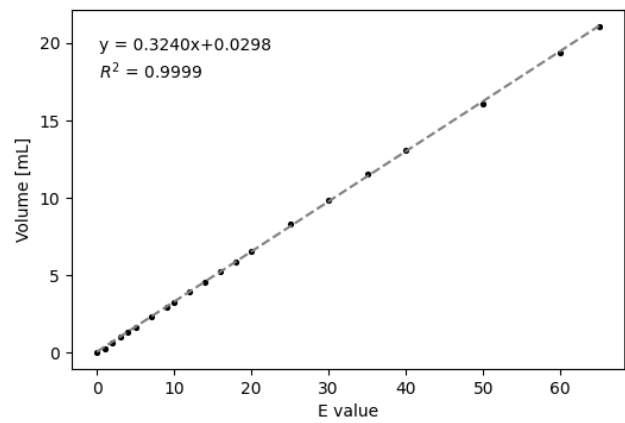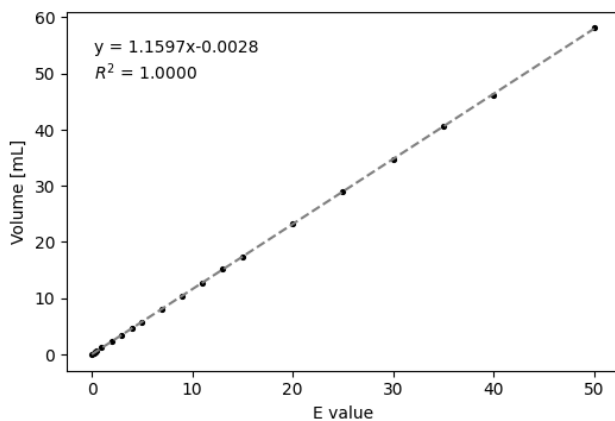

**Figure S15:** Calibration of various syringe sizes on a previous dosage module iteration. Each calibration was done by dispensing water.

**Table S1:** Summary of the calibration accuracy and precision. Each measurement was made as a triplicate and the order of dosing was randomized.

| Target volume [mL] | Actual volume [mL] | Deviation [mL] |
|--------------------|--------------------|----------------|
| 0.75               | 0.467 ± 0.014      | 0.297          |
| 1.50               | 1.240 ± 0.004      | 0.260          |
| 3.00               | 2.712 ± 0.045      | 0.288          |
| 4.00               | 3.729 ± 0.036      | 0.271          |
| 5.00               | 4.752 ± 0.014      | 0.248          |

# Chemistry and Analysis

## S6 ATR-FTIR and NMR of synthesised monomer

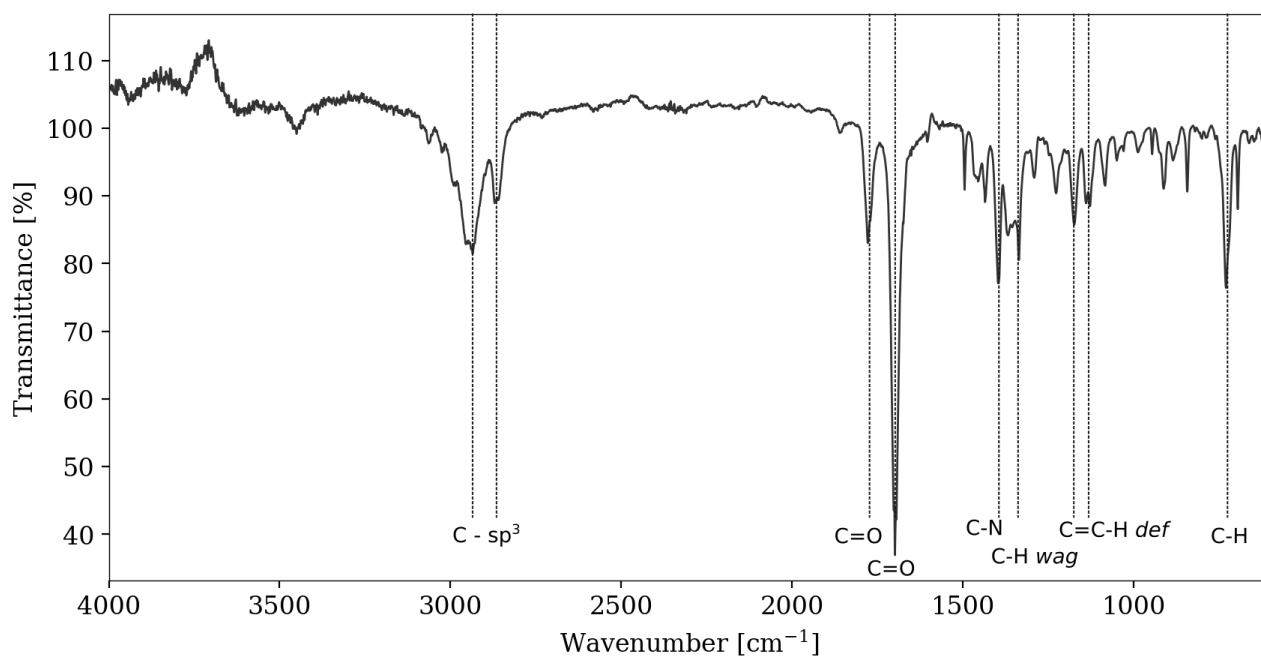

Figure S16: ATR-FTIR of the synthesised monomer.

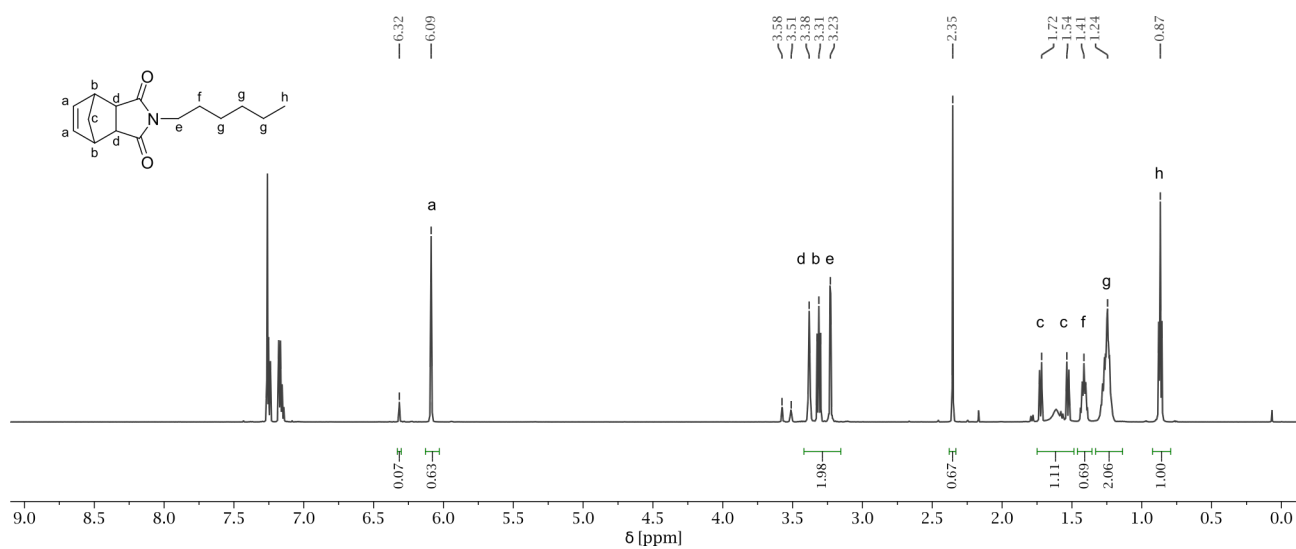

Figure S17:  $^1\text{H-NMR}$  spectrum of the synthesised monomer, referenced to  $\text{CHCl}_3$  at 7.26 ppm.

## S7 Grubbs catalyst

The Grubbs 3<sup>rd</sup> Generation initiator was made by reacting Grubbs 2<sup>nd</sup> Generation with pyridine. The conversion was based on the color change from red/brown (Figure S18, left) to bright green (Figure S18, right), and the yield was determined to 97.9 %.

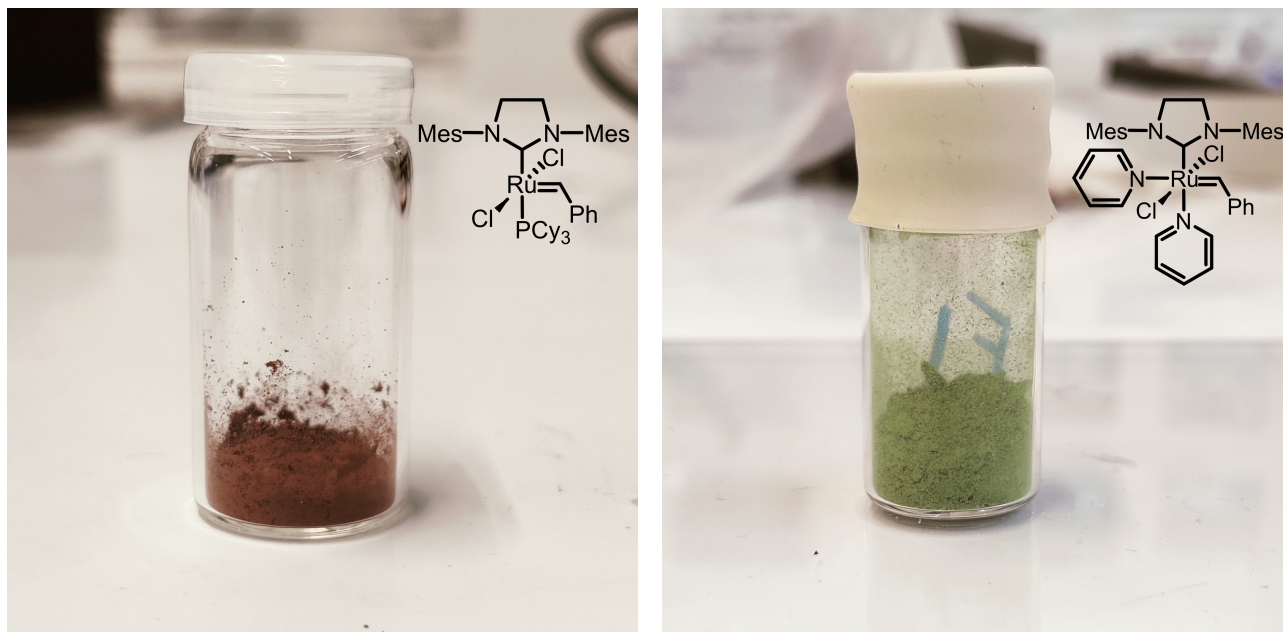

**Figure S18:** Images of the Grubbs 2<sup>nd</sup> generation catalyst (left) and the 3<sup>rd</sup> generation (right) after reaction with pyridine.

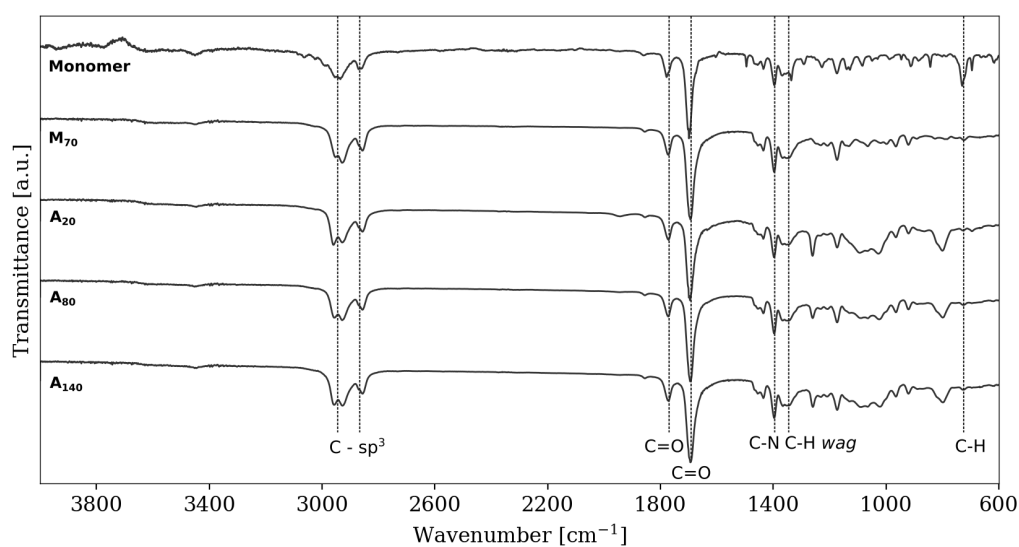

**Figure S19:** ATR-FTIR spectra of the monomer, the manual polymer **M<sub>70</sub>** and the automatically produced polymers **A<sub>20</sub>**, **A<sub>80</sub>**, and **A<sub>140</sub>**, which represents the entire range.

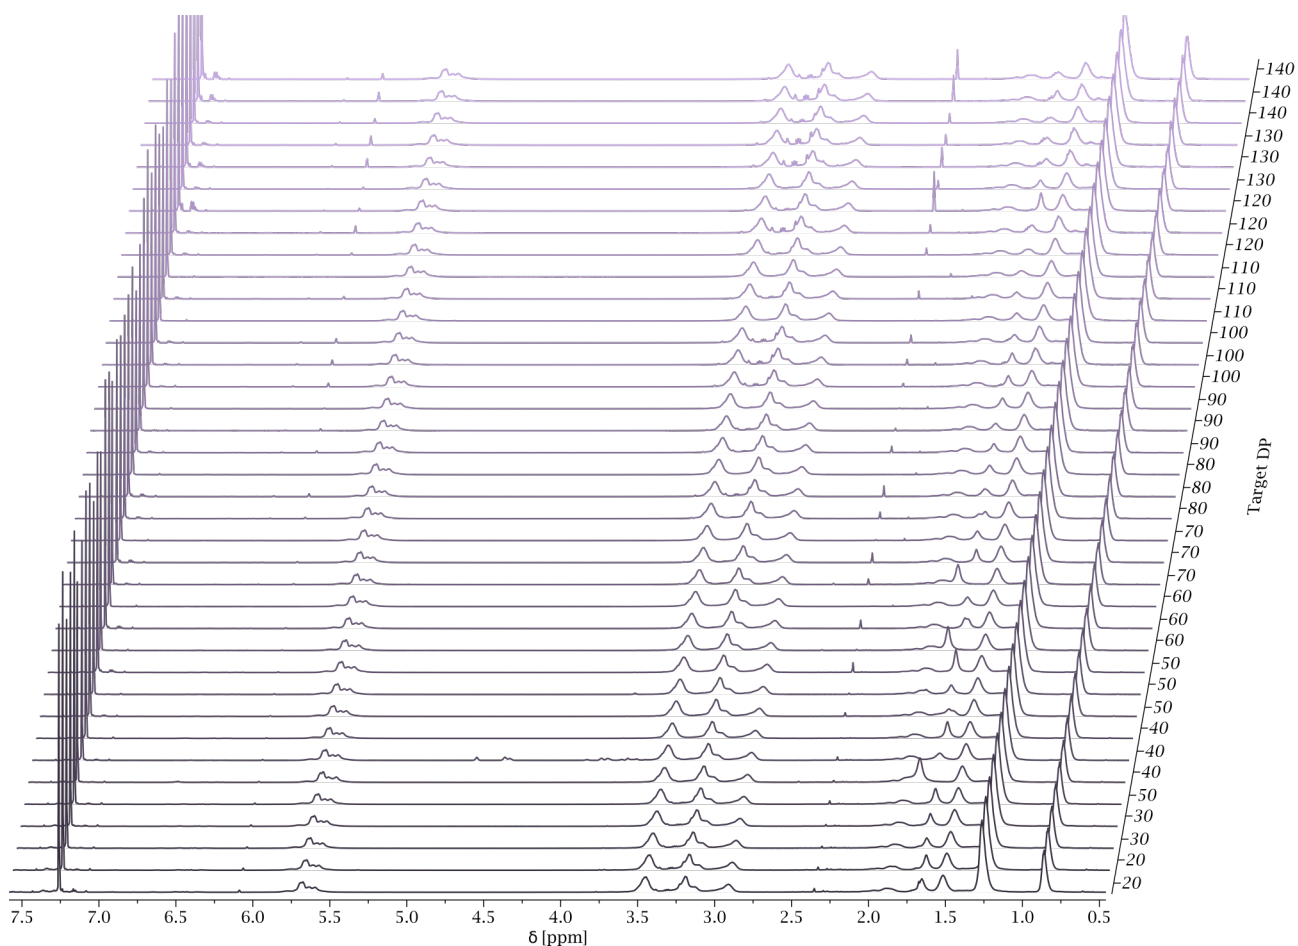

**Figure S20:** <sup>1</sup>H-NMR spectra of each 3x13 polymers automatically synthesized. Residuals from the deuterated solvent is seen at 7.26 ppm and impurities from toluene is present at 7.20 and 2.30 ppm.

## S8 Gel Permeation Chromatography

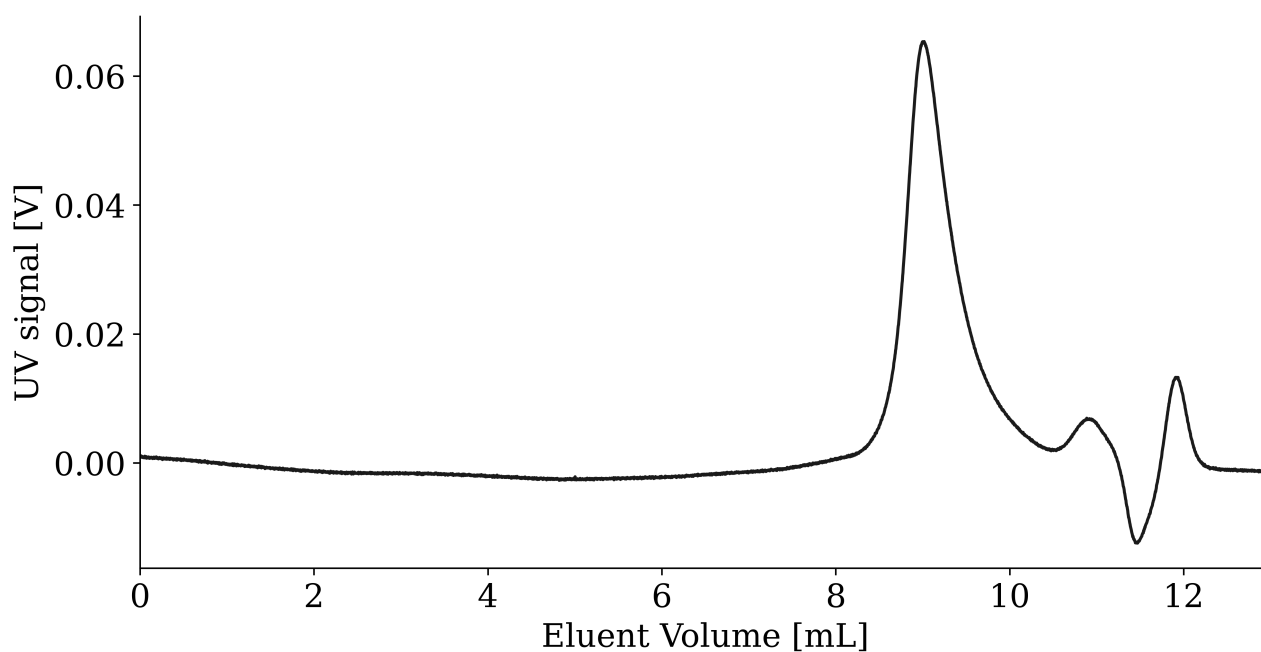

**Figure S21:** GPC chromatogram of M<sub>70</sub>.

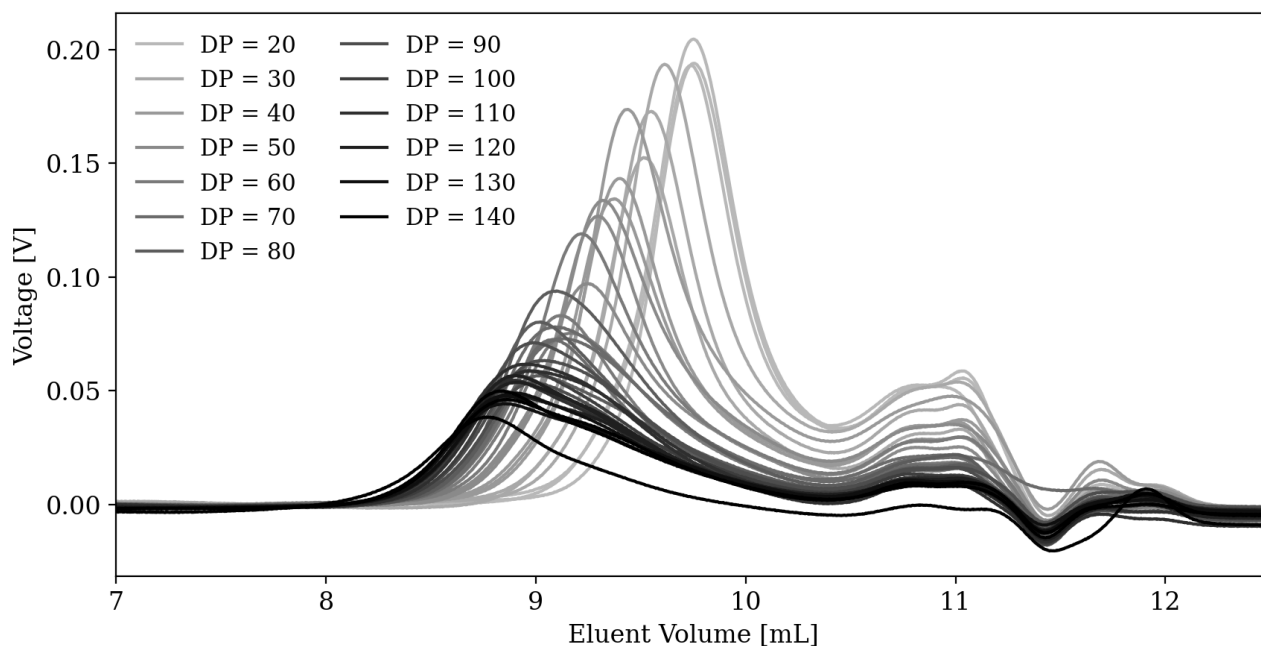

**Figure S22:** GPC chromatograms of all polymers synthesized by the ASM.

**Table S2:** The number and weight average molecular weights ( $\overline{M}_n$  and  $\overline{M}_w$ ) and the dispersity ( $\mathcal{D}$ ) of the automatically synthesized polymers are determined according to polystyrene standards. Each target  $\overline{DP}$  is given as an average of the triplicates.  $M_t$  denotes the theoretical mass of each polymer and the molecular weights.

| DP  | $M_t$ [kDa] | $\overline{M}_n$ [kDa] | $\overline{M}_w$ [kDa] | $\mathcal{D}$   | Conversion [%] |
|-----|-------------|------------------------|------------------------|-----------------|----------------|
| 20  | 5.67        | $7.99 \pm 0.10$        | $9.60 \pm 0.26$        | $1.20 \pm 0.02$ | 98.36          |
| 30  | 8.15        | $11.61 \pm 0.79$       | $14.39 \pm 1.02$       | $1.24 \pm 0.01$ | 99.01          |
| 40  | 10.62       | $15.33 \pm 0.93$       | $19.49 \pm 1.41$       | $1.27 \pm 0.02$ | 99.38          |
| 50  | 13.09       | $19.24 \pm 1.09$       | $25.65 \pm 1.82$       | $1.33 \pm 0.02$ | 99.67          |
| 60  | 15.57       | $23.68 \pm 1.80$       | $32.03 \pm 2.62$       | $1.35 \pm 0.02$ | 99.50          |
| 70  | 18.04       | $26.88 \pm 1.12$       | $38.11 \pm 1.16$       | $1.42 \pm 0.02$ | 99.34          |
| 80  | 20.51       | $28.36 \pm 1.87$       | $40.04 \pm 3.03$       | $1.41 \pm 0.03$ | 99.01          |
| 90  | 22.99       | $31.33 \pm 1.07$       | $46.11 \pm 1.94$       | $1.47 \pm 0.02$ | 99.01          |
| 100 | 25.46       | $34.51 \pm 1.02$       | $51.33 \pm 1.96$       | $1.49 \pm 0.01$ | 96.77          |
| 110 | 27.93       | $36.01 \pm 2.69$       | $54.97 \pm 4.25$       | $1.53 \pm 0.02$ | 99.34          |
| 120 | 30.41       | $36.81 \pm 0.17$       | $55.95 \pm 1.61$       | $1.52 \pm 0.04$ | 97.09          |
| 130 | 32.88       | $39.27 \pm 0.94$       | $60.78 \pm 1.71$       | $1.55 \pm 0.02$ | 95.54          |
| 140 | 35.35       | $46.44 \pm 7.55$       | $75.01 \pm 14.61$      | $1.61 \pm 0.06$ | 95.85          |

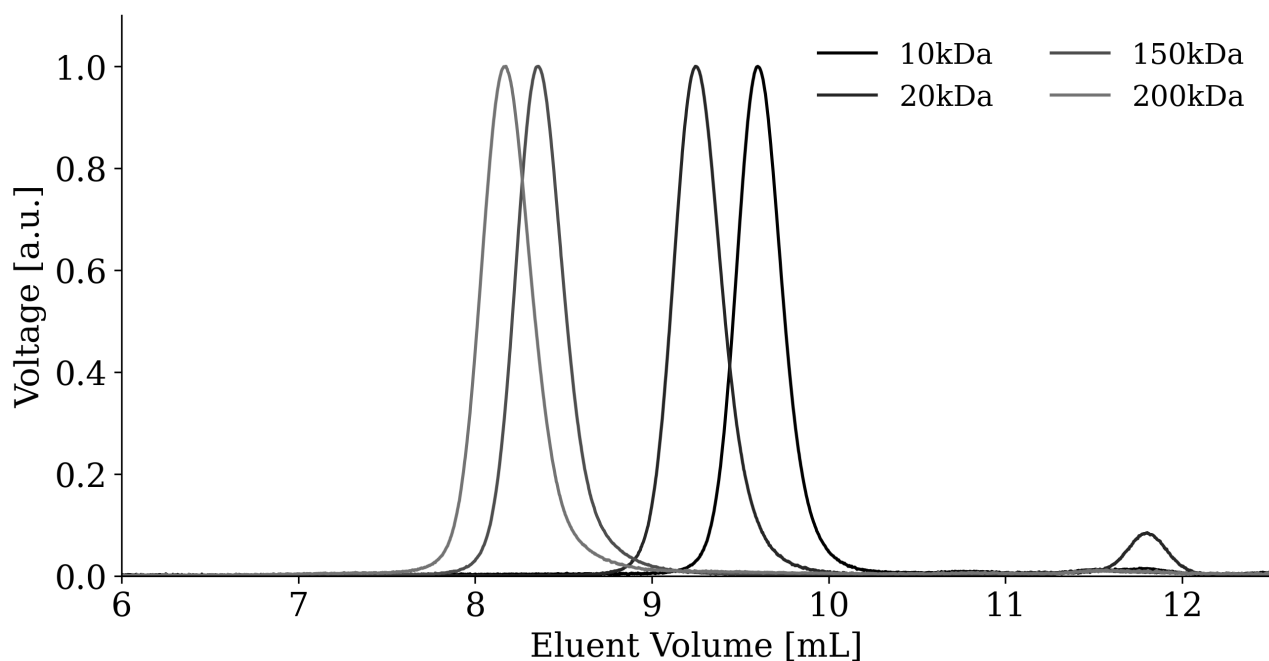

**Figure S23:** GPC chromatograms of the polystyrene standards used for calibration. The signals are normalized relative to the highest peak. All standards were obtained from Sigma Aldrich; 10 kDa ( $\mathcal{D} = 1.04$ ), 20 kDa ( $\mathcal{D} = 1.05$ ), 150 kDa ( $\mathcal{D} = 1.03$ ), and 200 kDa ( $\mathcal{D} = 1.03$ )

**Table S3:** The number and weight average molecular weights ( $\overline{M}_n$  and  $\overline{M}_w$ ) and the dispersity ( $\mathcal{D}$ ) of the polystyrene standard.  $M_t$  denotes the mass reported by the producer. Additionally, the table reports the conversion of the monomer calculated through  $^1\text{H-NMR}$

| $M_t$ [kDa] | $\overline{M}_n$ [kDa] | $\overline{M}_w$ [kDa] | $\mathcal{D}$ |
|-------------|------------------------|------------------------|---------------|
| 10          | 9.28                   | 10.05                  | 1.08          |
| 20          | 18.94                  | 20.83                  | 1.10          |
| 150         | 126.65                 | 139.93                 | 1.10          |
| 200         | 188.81                 | 209.05                 | 1.11          |

## Bill of Materials

**Table S4:** Bill of materials

| Description          | Quantity         | Location | Notes                                                                             | Cost [DKK] |
|----------------------|------------------|----------|-----------------------------------------------------------------------------------|------------|
| <b>General</b>       |                  |          |                                                                                   |            |
| 3D printer           | 1                |          | We used a Prusa i3 clone with an Arduino Mega and a Ramps 1.4 shield attached [3] | 3500       |
| 1.75 mm PLA filament | 1 spool (1000 g) |          | For production of various parts and pieces                                        | 170        |
| Wires                | A lot            | All over |                                                                                   | 36         |



|                                 |                        |                                                       |                                                                                         |               |
|---------------------------------|------------------------|-------------------------------------------------------|-----------------------------------------------------------------------------------------|---------------|
| RampsXB                         | 1                      | Attachment to the Ramps 1.4 shield                    | RampsXB is an expired product, similar boards can be used (e.g. Ramps stepper expander) | -             |
| M3 screws                       | A lot                  | All threads are made for M3 screws in various lengths | Get a set from 3 to 20 mm                                                               | 150           |
| Mechanical end-stop             | 1                      | Replaces the induction sensor for the Z-axis          |                                                                                         | 80            |
| Polycarbonate sheets, 3mm       | About 1 m <sup>2</sup> | Stirring and inert modules                            |                                                                                         | 299           |
| <b>Dosage module</b>            |                        |                                                       |                                                                                         |               |
| Custom pump                     | 1-5                    | Attaches to the machine                               | Similar pump systems can be used                                                        | 500 per pump  |
| Bücker three-way solenoid valve | 1 per pump             | Placed on the pump                                    | Controls the flow direction                                                             | 1,061         |
| Tube fittings                   | 3 per valve            | Fits the ports on the valve                           |                                                                                         | 66            |
| Silicone tubing 4 mm ID         | A lot                  | Pump module                                           | Connects stock solutions to the machine                                                 | 450 for 7.6 m |
| BlueCap flask 250 mL            | 1 per pump             | Connected to the valve                                | Contains stock solution                                                                 | 25 per flask  |
| Special cannula                 | 1 per pump             | Connects the blue cap to tubing                       |                                                                                         | 20 per needle |
| Rubber septum                   | 1 per pump             | BlueCap lid                                           | Seals the modified BlueCap lid                                                          | 20 per septum |
| 50 x 0.8 mm 21g sterile syringe | 1 box (100 pcs)        | In the needle module                                  | Different needles can be used with slight modifications                                 | 34            |
| <b>Stirring module</b>          |                        |                                                       |                                                                                         |               |
| 12 DC motors                    | 45                     | Stirring module                                       |                                                                                         | 1750          |
| Teflon coated magnets 20x6 mm   | 45                     | Stirring module                                       |                                                                                         | 608           |
| Teflon coated magnets 15x4.5 mm | 45                     | Stirring module                                       |                                                                                         | 428           |
| PWM controller                  | 3                      | Stirring module                                       |                                                                                         | 300           |

|                                  |              |                                                                           |                          |                    |
|----------------------------------|--------------|---------------------------------------------------------------------------|--------------------------|--------------------|
| ABS box                          | 1            | Stirring module                                                           | Holds the PWM controller | 79                 |
| <b>Atmosphere control module</b> |              |                                                                           |                          |                    |
| Luer lock male and female set    | 10 sets      | In the silicone tubing and for gas inlet in the atmosphere control module |                          | 100                |
| Total cost                       | With 1 pump  |                                                                           |                          | 9,676 ≈ 1,300 EUR  |
|                                  | With 5 pumps |                                                                           |                          | 16,439 ≈ 2,205 EUR |

## References

- [1] T. B. Jensen, J. R. Saugbjerg, and M. L. Henriksen, *Information and documentation on the automatic synthesis machine via github repository*, 2023. [Online]. Available: <https://gitfront.io/r/user-2909906/5yxxNBqEmKoo/ASM-v1.0/>.
- [2] [Online]. Available: <https://osf.io/qcnjt/>, 02/03/2023.
- [3] [Online]. Available: <http://prusa.saml.e.dk/>.
